# Supplementary material for: Epigenetic Priming with Decitabine Augments the Therapeutic Effect of Cisplatin on Triple-Negative Breast Cancer Cells through Induction of Proapoptotic Factor NOXA
Source: MDPI journal article supplement (doi:10.3390/cancers14010248), 2022-01-04
Supplement: s1 [file s1]

Supplementary Information for

Epigenetic priming with decitabine augments the therapeutic effect of cisplatin on triple-negative breast cancer cells through induction of proapoptotic factor NOXA

Nakajima et al.

Supplementary Figure 1

(Figure1e)

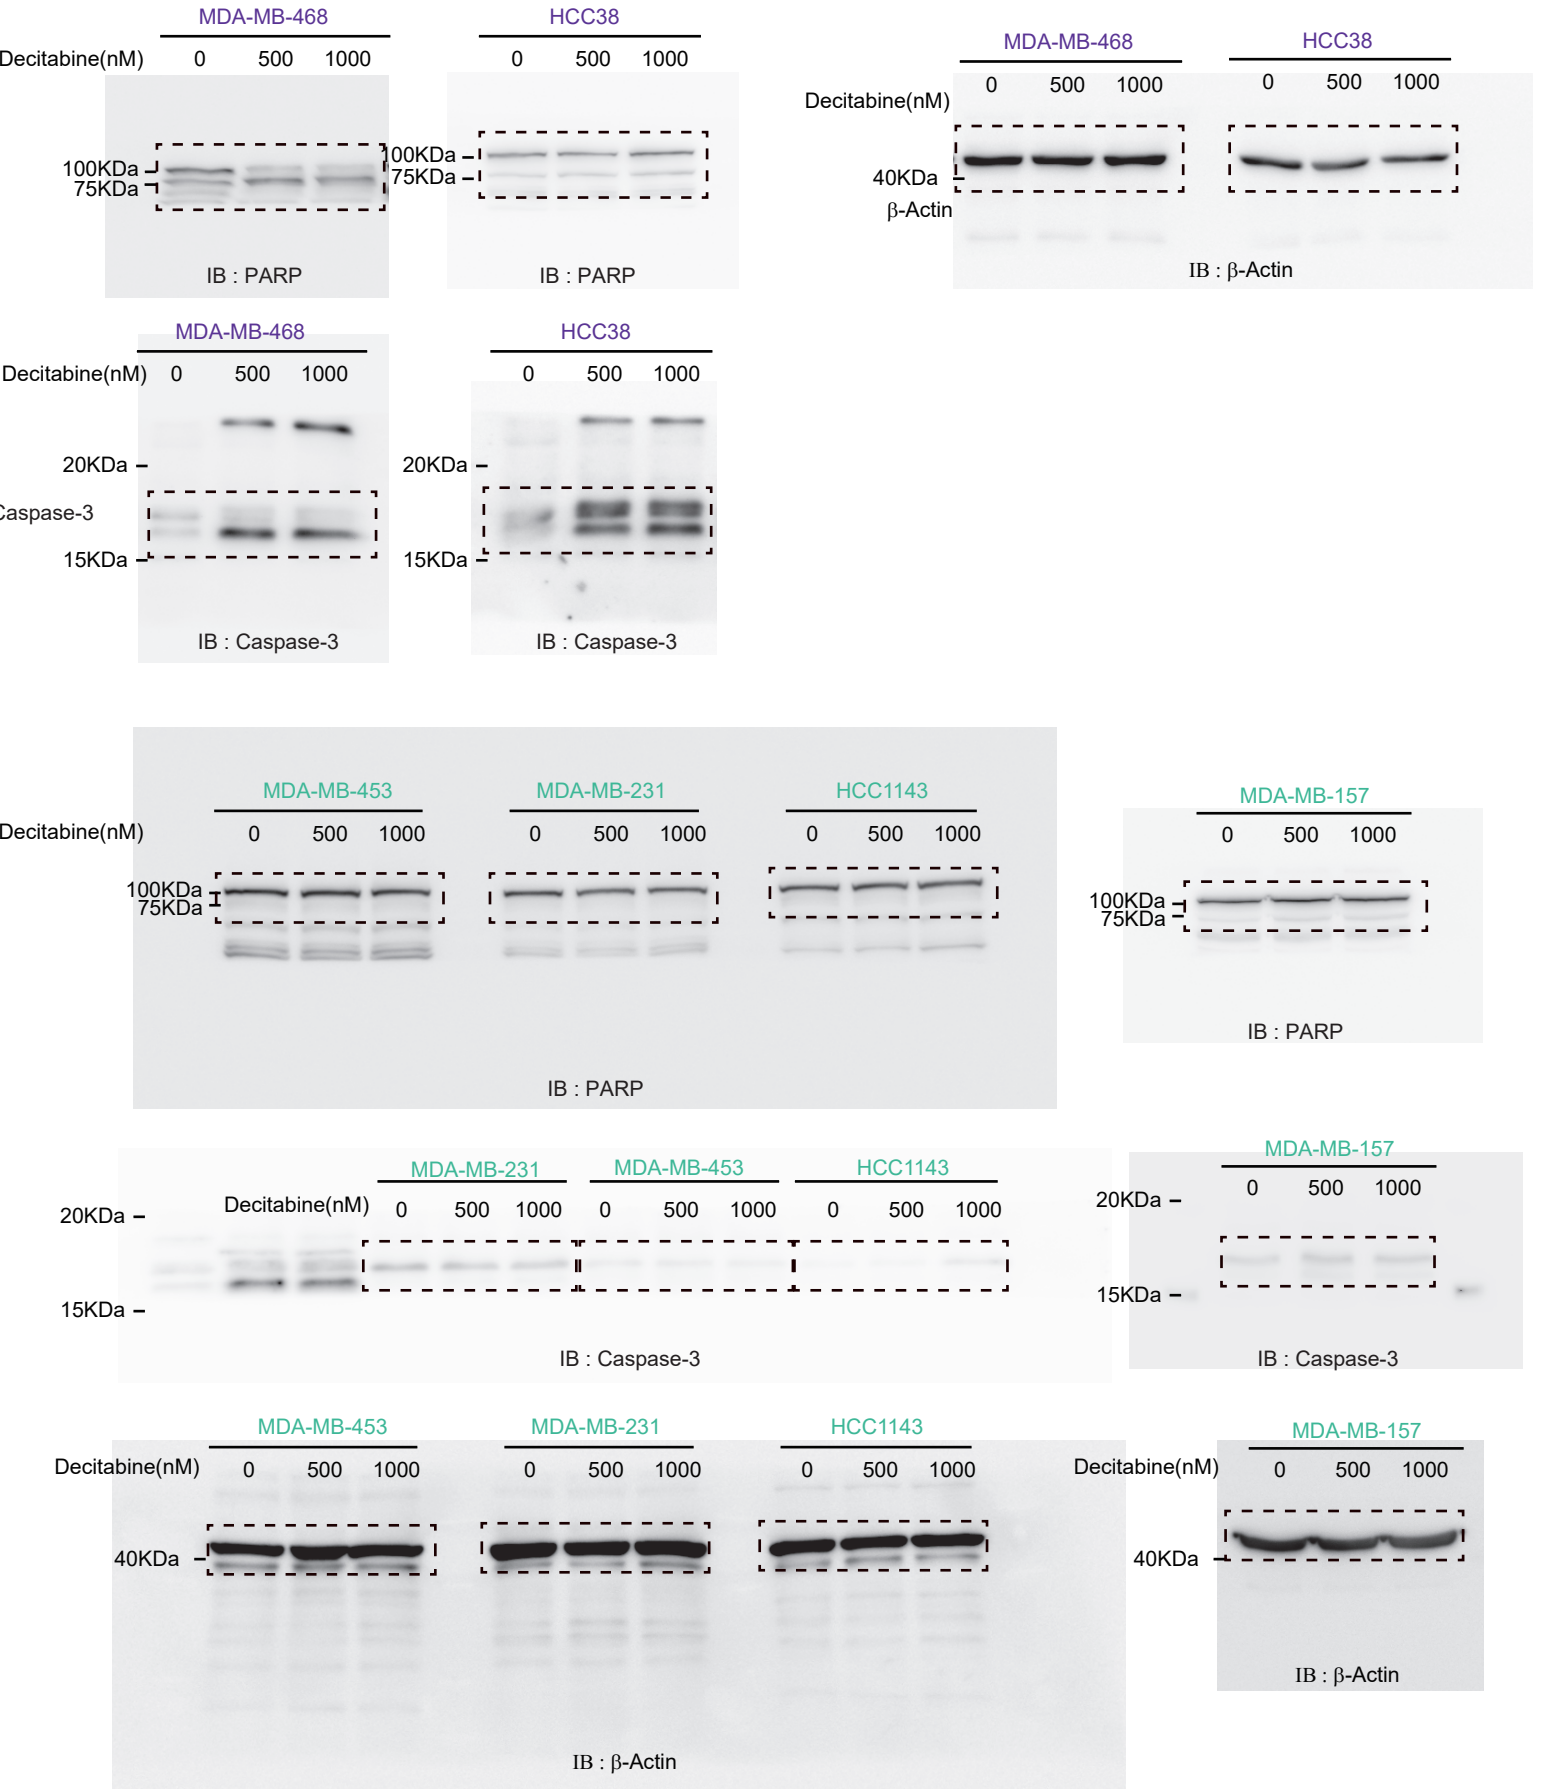

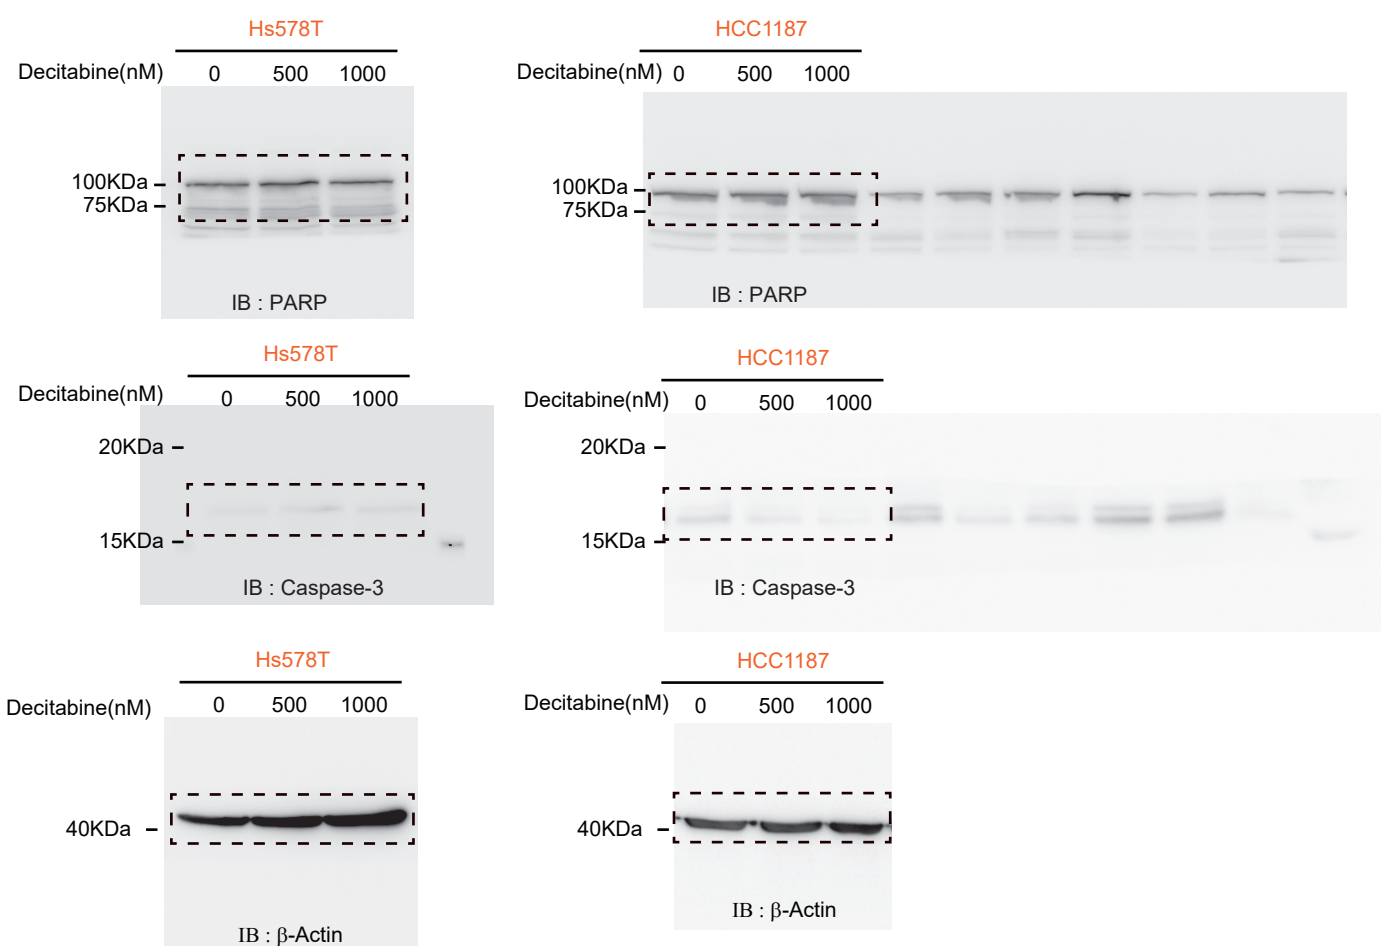

Figure S1. Raw data of Immunoblot from Fig 1.

Supplementary Figure 2

(Figure3d)

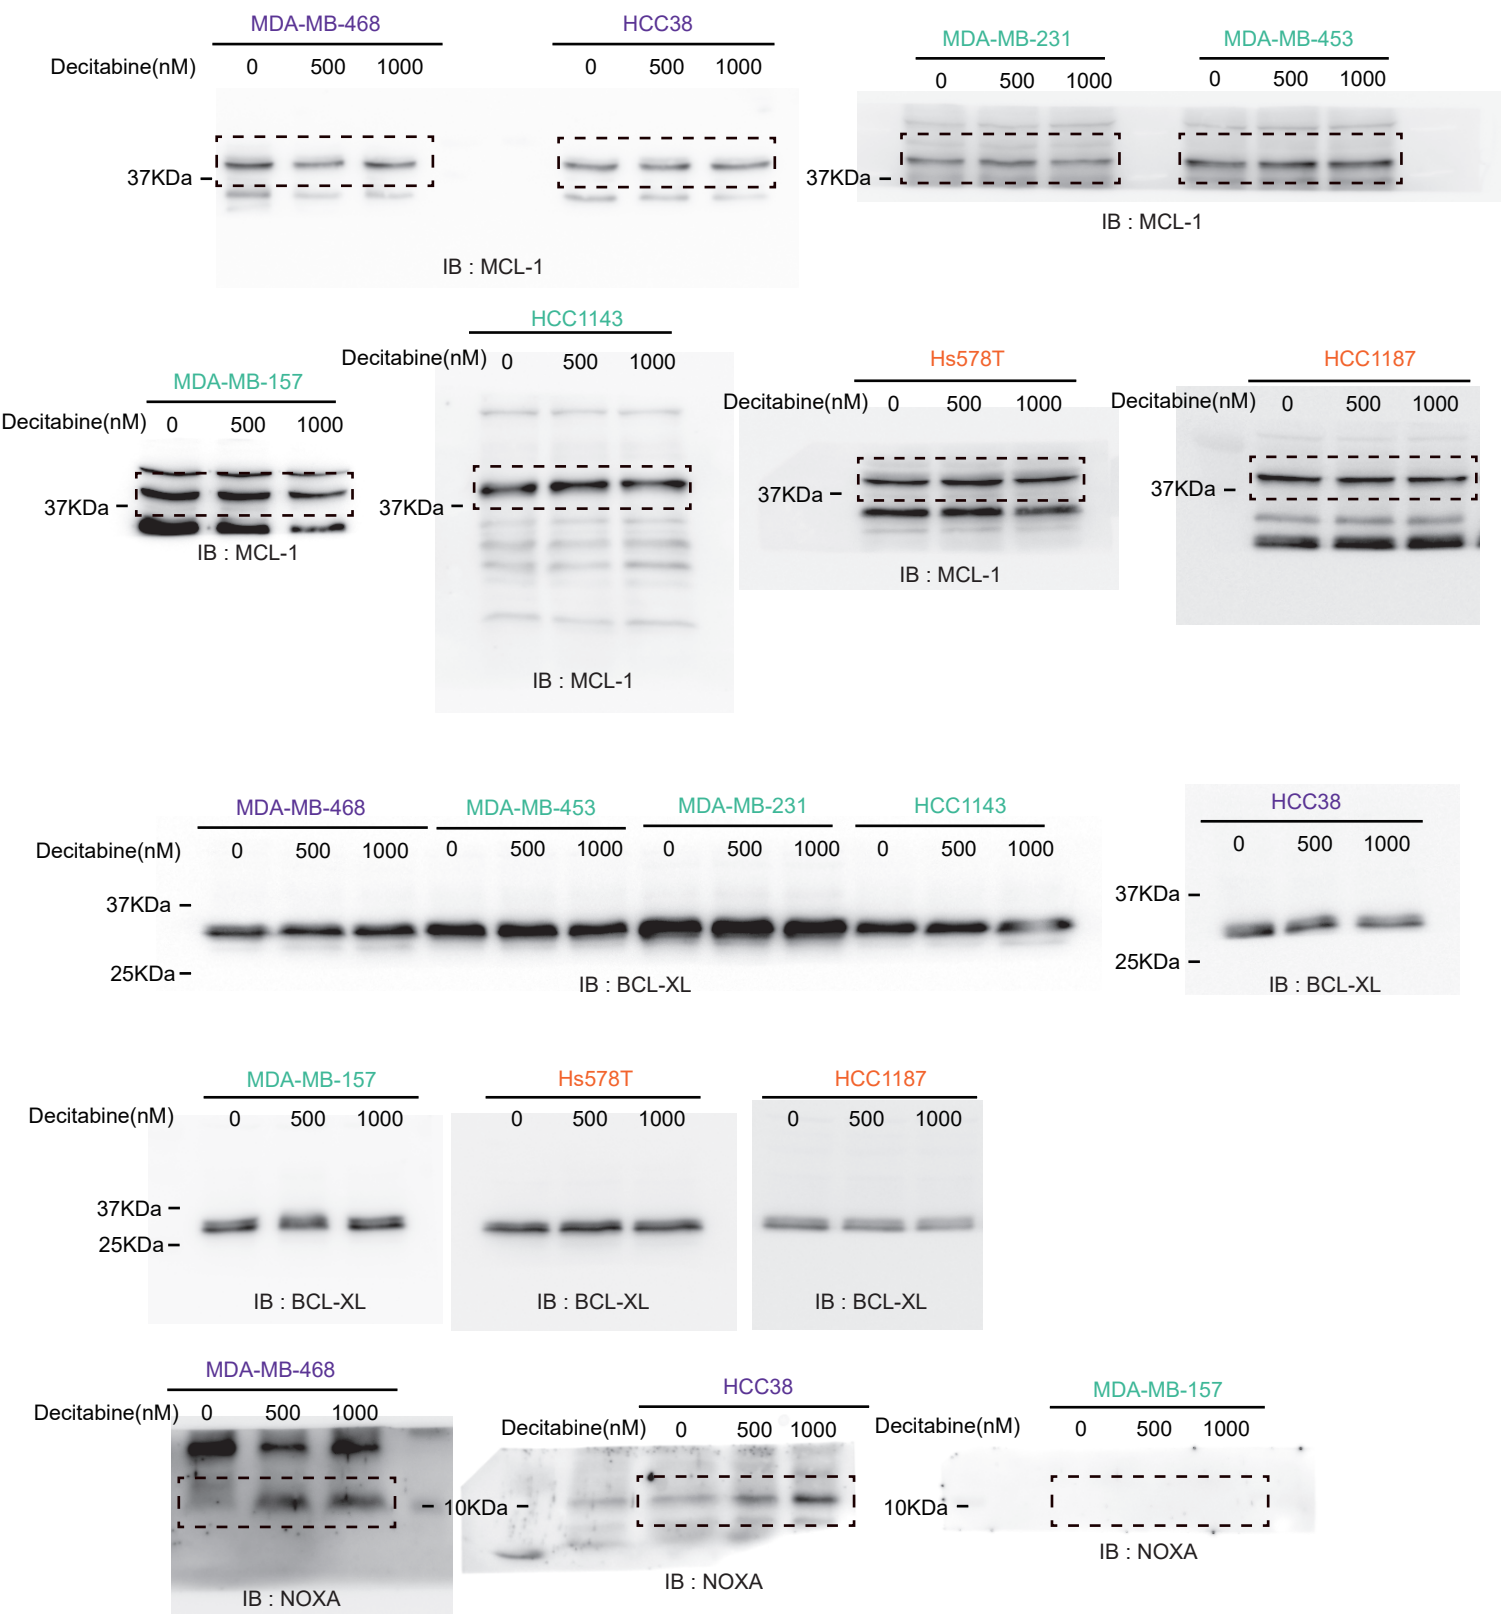



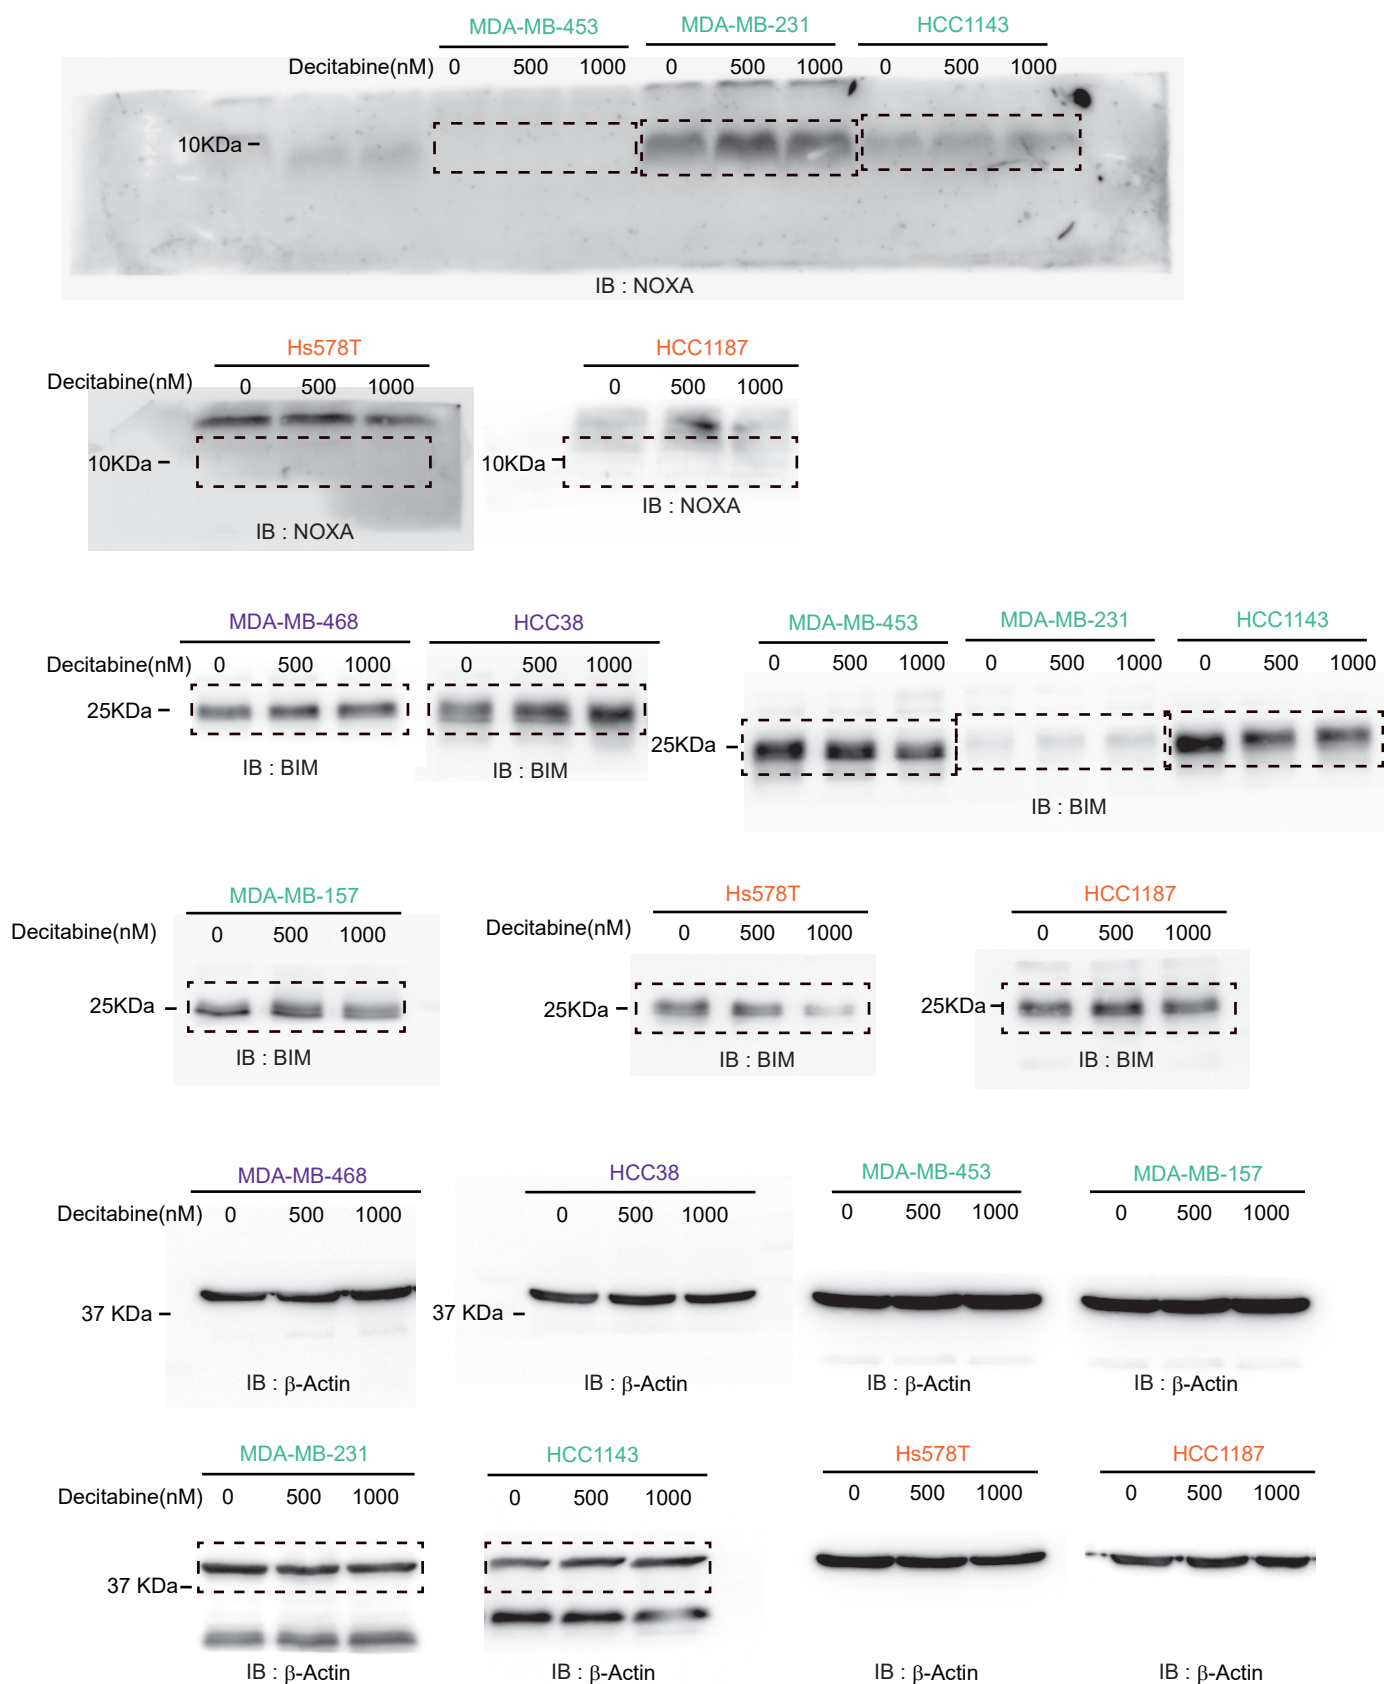

Figure S2. Raw data of Immunoblot from Fig 3.

Supplementary Figure 3

(Figure4c)

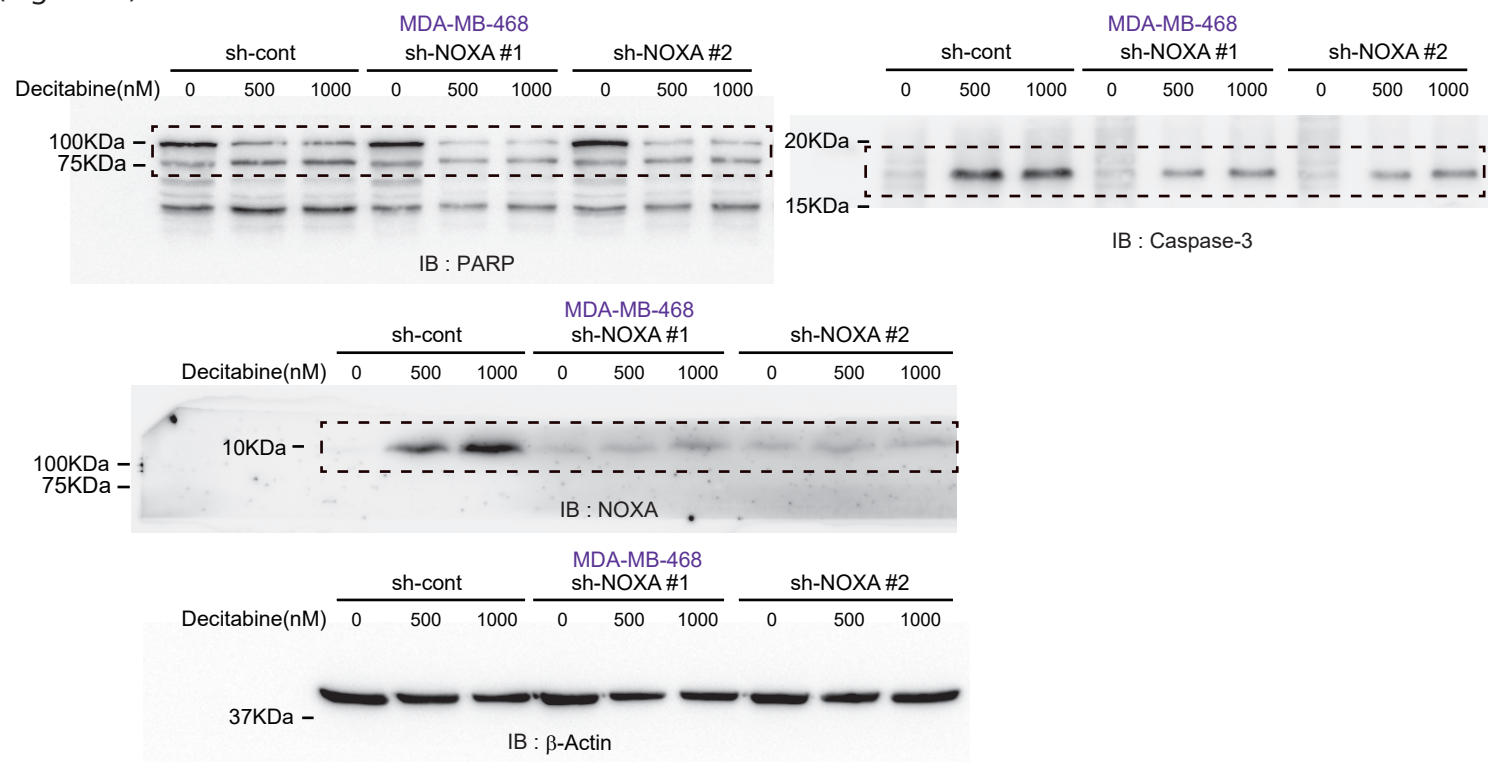

(Figure4f)

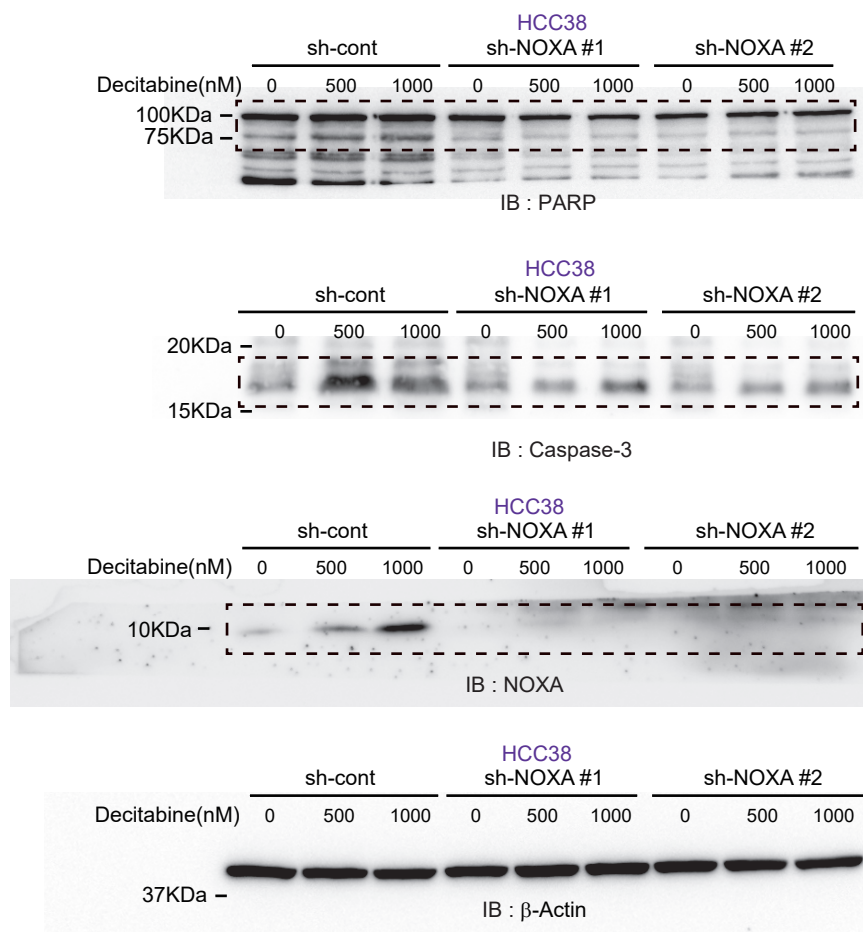

Figure S3. Raw data of Immunoblot from Fig 4.

Supplementary Figure 4

(Figure5b)

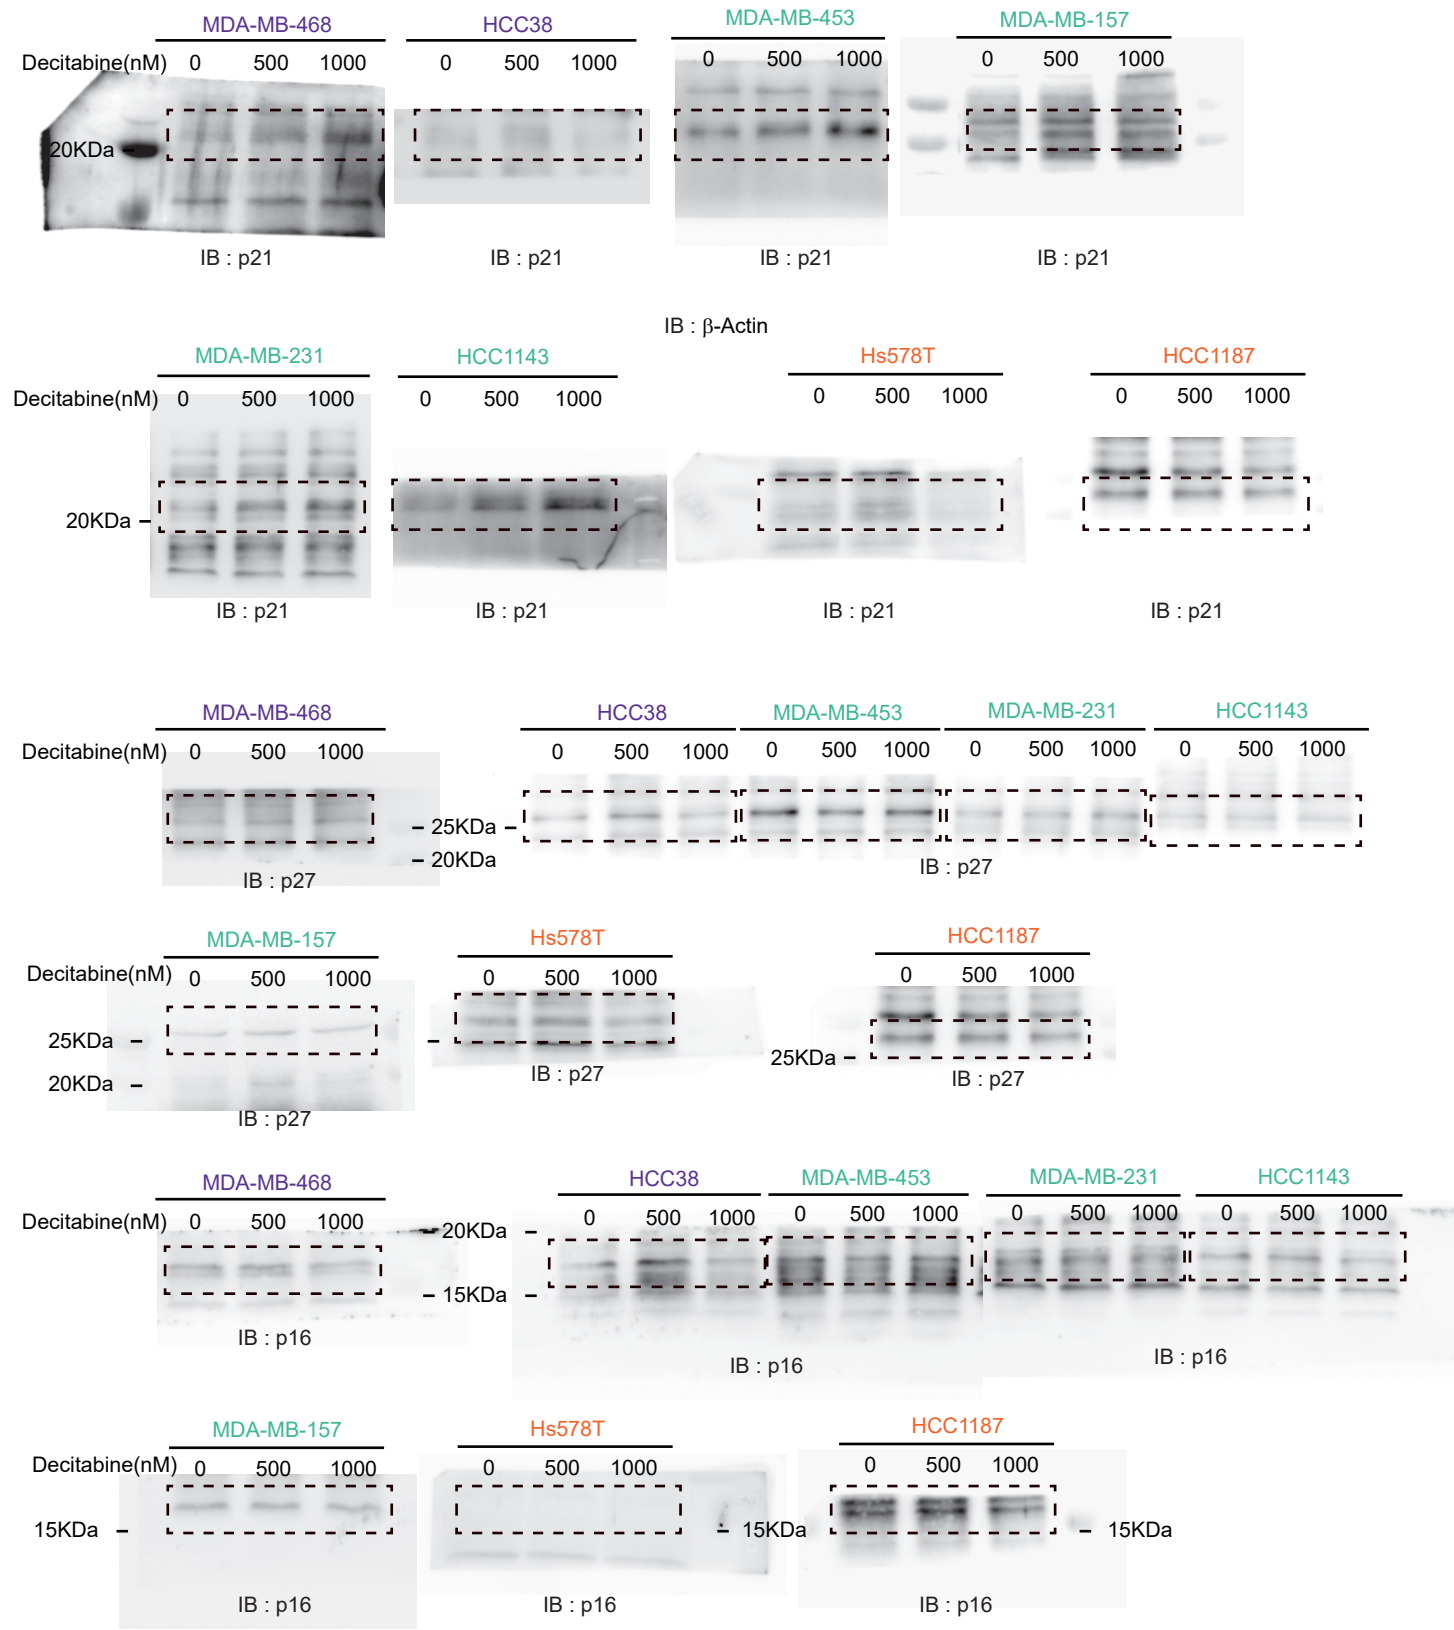

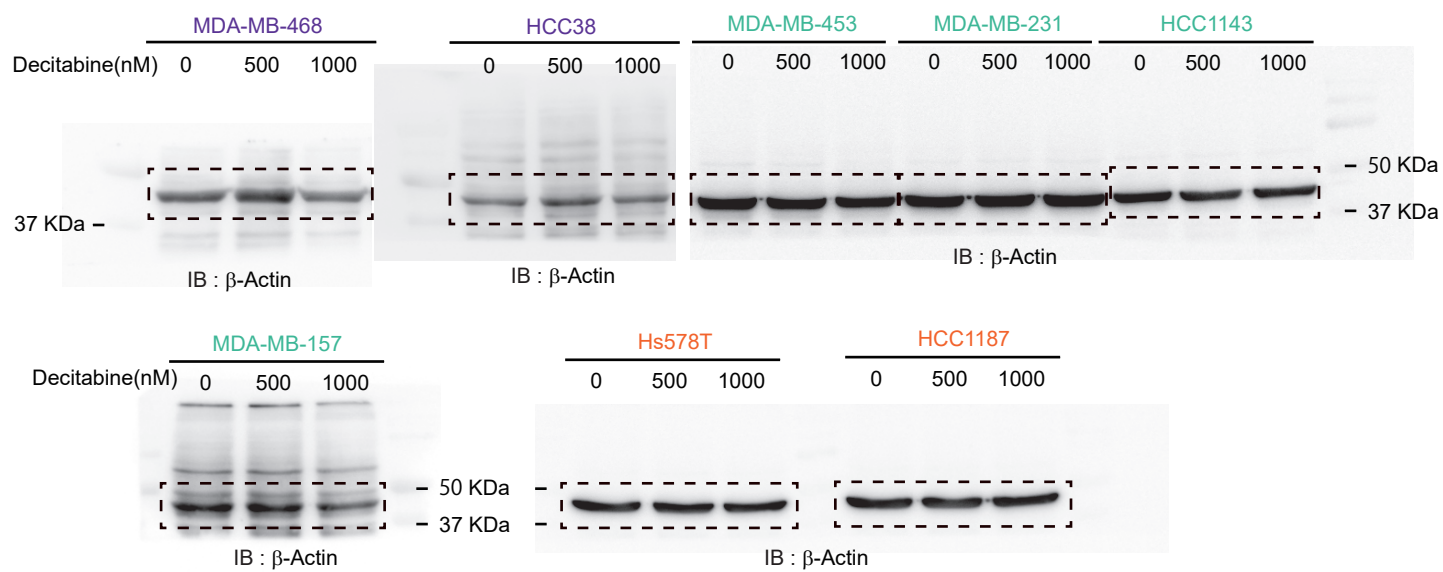

Figure S4. Raw data of Immunoblot from Fig 5.

Supplementary Figure 5

(Figure6a)

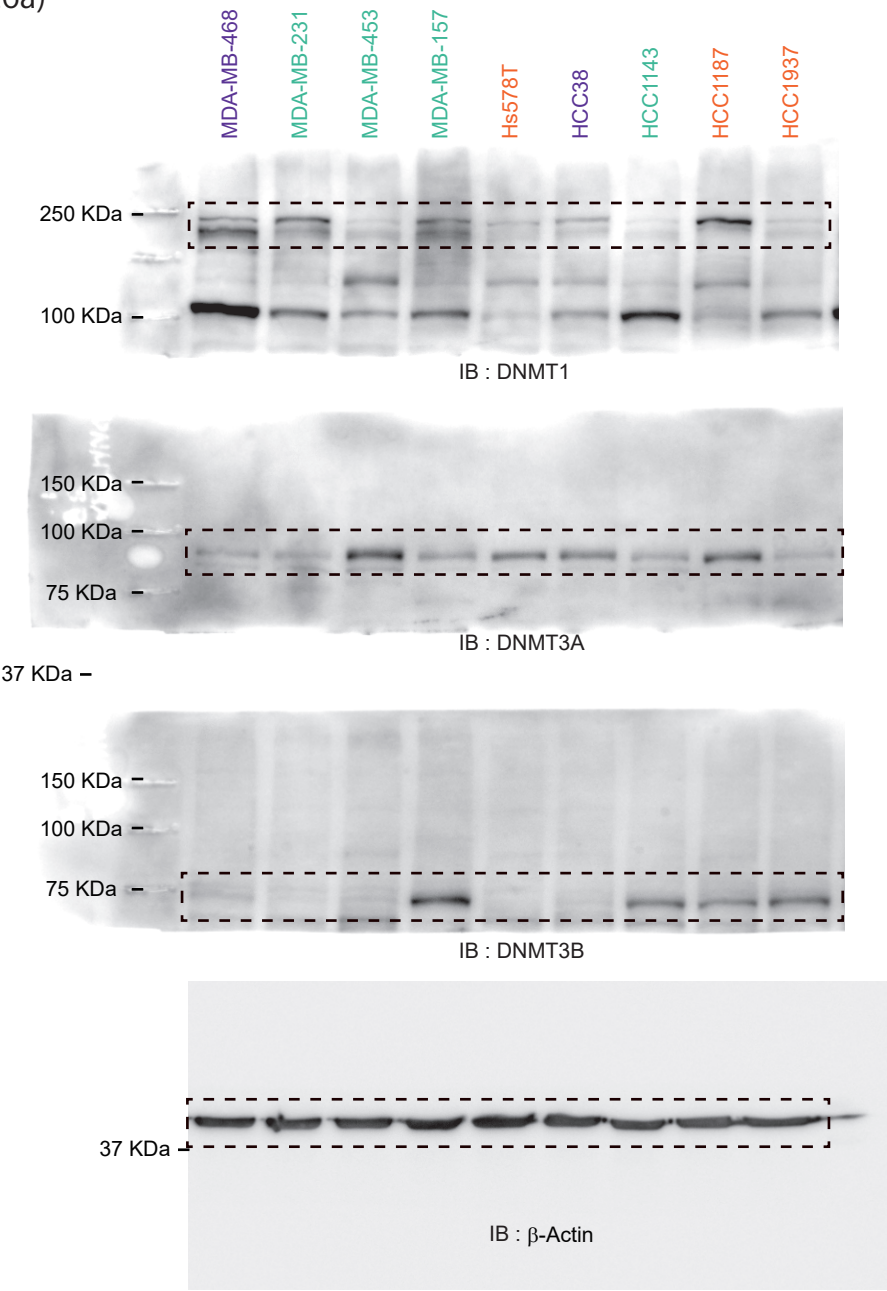



(Figure6b)

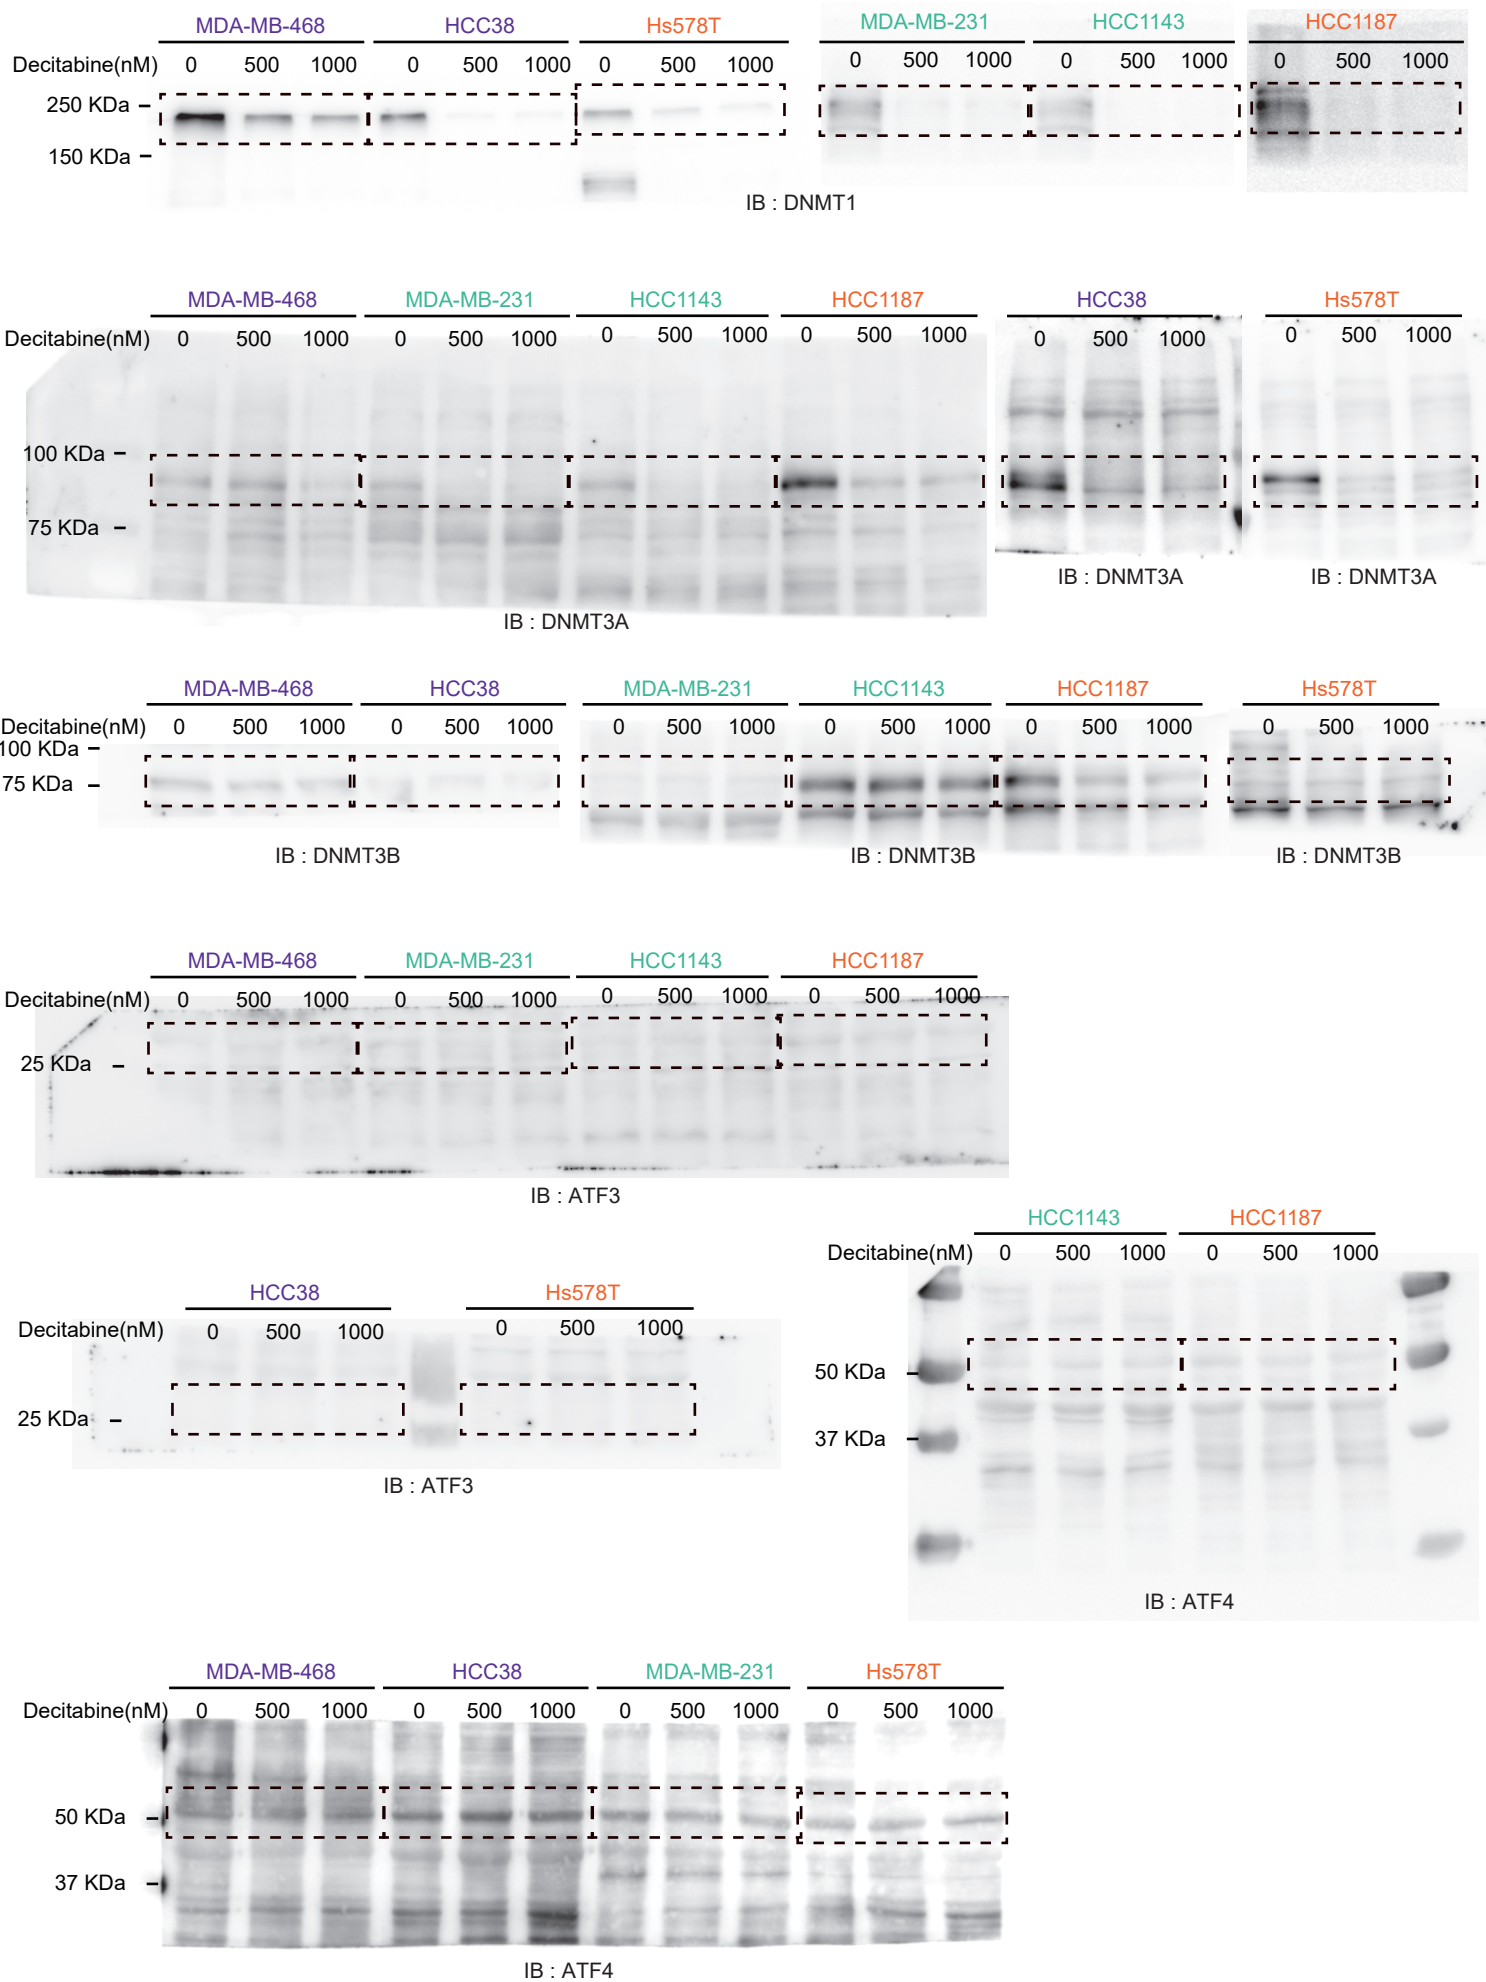

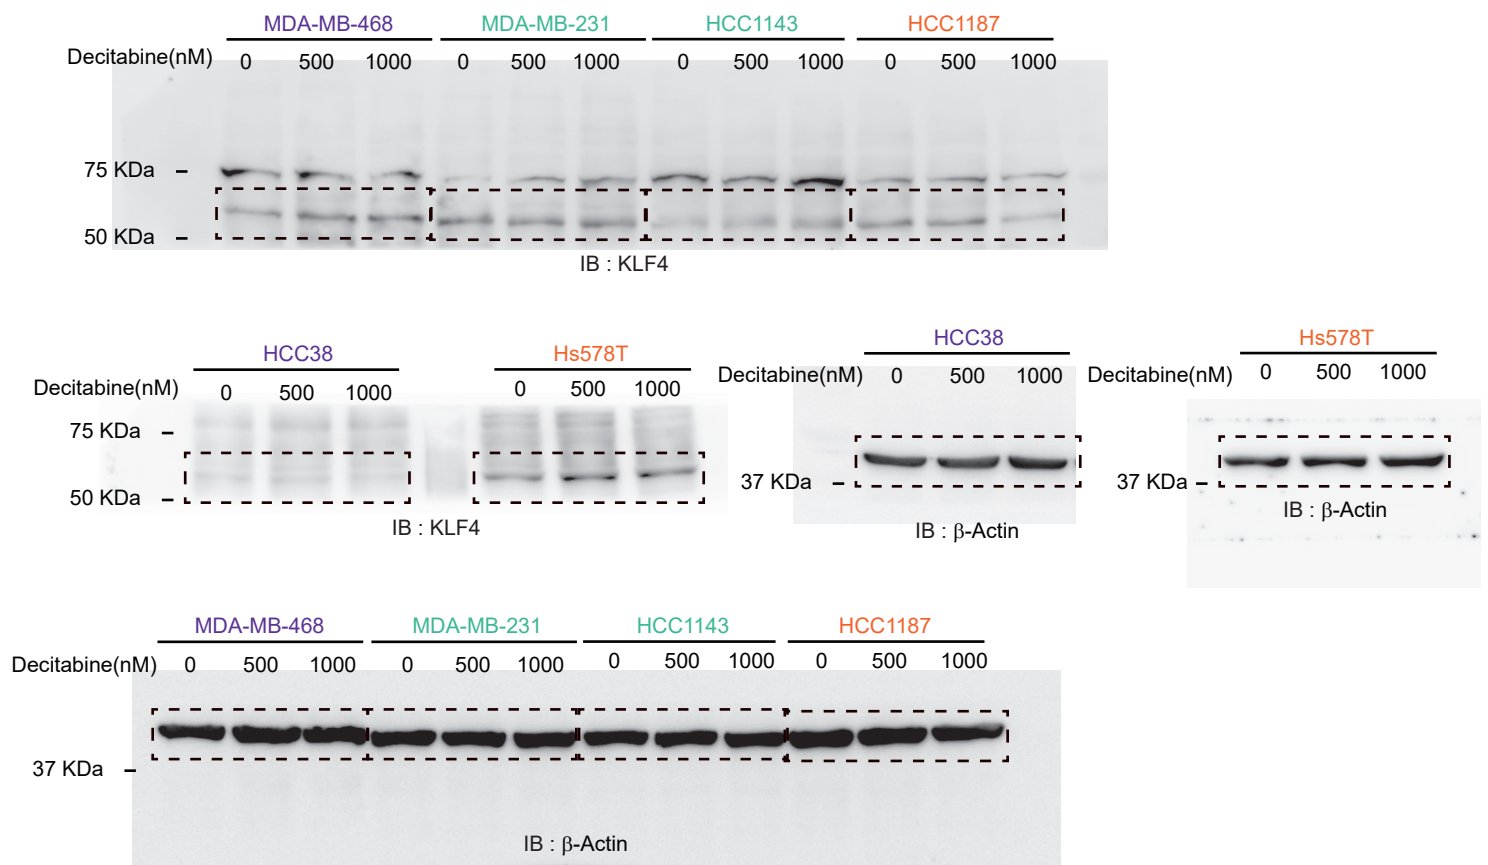

Figure S5. Raw data of Immunoblot from Fig 6.



## Supplementary Figure 6

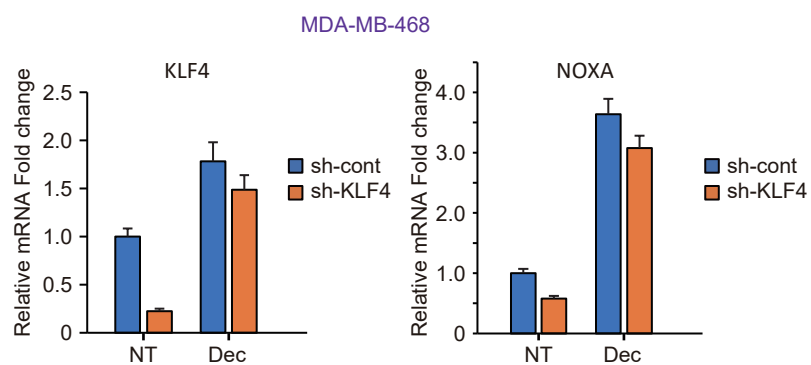

Figure S6. KLF4 did no effect on the induction of NOXA by decitabine. MDA-MB-468 cells were infected with shRNAs (sh-control and sh-KLF4). Cells were exposed to 500 nM decitabine. After treatment for 72 h, mRNA levels were measured by quantitative real-time PCR (qPCR). Error bars indicate SD (n=3).

Supplementary Figure 7

(Figure8c)

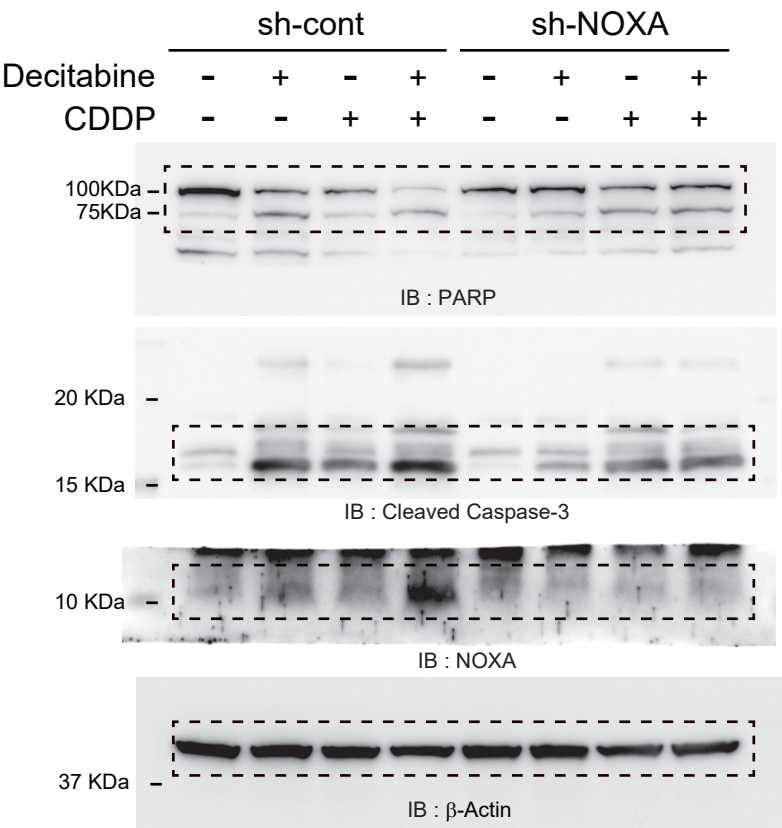

Figure S7. Raw data of Immunoblot from Fig 8.
